# Supplementary material for: Unveiling Causality: Does Demolishing Informal Settlements Cause Urban Surface Cooling?
Source: Research Square preprint supplement (doi:10.21203/rs.3.rs-7288639/v1), 2025-10-29
Supplement: Supplementary file 1 [file c04b352ee4de323bee9ead08.docx]

# Supplementary Material for *Unveiling Causality: Does Demolishing Informal Settlements Cause Urban Surface Cooling?*

**Supplementary Table 1| Summary Statistics for Control Variables**

|  | **Observation** | **Mean** | **SD** | **Min** | **Median** | **Max** | **Unit** |
| --- | --- | --- | --- | --- | --- | --- | --- |
| Urban Population | 13635 | 1073.92 | 685.32 | 533.88 | 654.68 | 2489.43 | ten thousand |
| Air temperature | 13839 | 300.71 | 0.95 | 297.15 | 301.01 | 302.06 | K |
| Urban construction land area | 12075 | 1004.49 | 627.53 | 306.88 | 722.04 | 2915.56 | km2 |
| Nighttime light data | 13860 | 29.53 | 10.11 | 16.51 | 28.64 | 67.42 | total brightness value (ten thousand) |

###

**Supplementary Table 2| Aggregate statistics of Points-of-Interest (POIs) in demolished informal settlements in three cities. The detailed numbers of POIs in each demolished settlement are shown in Supplementary Table 3.**

| City | Percentage of Points of Interest (POIs) | | |
| --- | --- | --- | --- |
| Residential Building | Commercial Building | Park |
| Beijing | 37.7% | 49.2% | 13.1% |
| Shanghai | 88.1% | 11.9% | 0.0% |
| Guangzhou | 48.0% | 48.0% | 4.0% |

**Supplementary Table 3| Statistics of points of interest in demolished informal settlements**

| **Settlement ID** | **Area (km2)** | **lon** | **lat** | **Residential Building** | **Park** | **Office Building** | **Year of Demolition** |
| --- | --- | --- | --- | --- | --- | --- | --- |
| BJ1 | 0.485 | 116.40 | 39.98 | 2 | 2 | 14 | 2007 |
| BJ2 | 0.352 | 116.28 | 40.06 | 0 | 0 | 0 | 2010 |
| BJ3 | 0.503 | 116.49 | 40.00 | 3 | 4 | 9 | 2009 |
| BJ4 | 0.018 | 116.33 | 39.99 | 0 | 0 | 1 | 2014 |
| BJ5 | 0.853 | 116.45 | 39.86 | 3 | 0 | 1 | 2016 |
| BJ6 | 0.836 | 116.45 | 39.85 | 3 | 1 | 2 | 2016 |
| BJ7 | 0.334 | 116.45 | 39.85 | 3 | 0 | 0 | 2012 |
| BJ8 | 0.151 | 116.44 | 39.85 | 3 | 0 | 3 | 2016 |
| BJ9 | 0.069 | 116.44 | 39.84 | 1 | 0 | 0 | 2010 |
| BJ12 | 0.048 | 116.45 | 39.83 | 0 | 0 | 0 | 2010 |
| BJ13 | 0.122 | 116.45 | 39.84 | 1 | 0 | 0 | 2012 |
| BJ14 | 0.113 | 116.24 | 39.89 | 4 | 1 | 0 | 2011 |
| SH1 | 0.015 | 121.58 | 31.12 | 1 | 0 | 0 | 2014 |
| SH2 | 0.014 | 121.58 | 31.12 | 0 | 0 | 1 | 2016 |
| SH3 | 0.006 | 121.58 | 31.12 | 0 | 0 | 0 | 2016 |
| SH5 | 0.387 | 121.51 | 31.13 | 1 | 0 | 0 | 2016 |
| SH6 | 0.326 | 121.52 | 31.13 | 2 | 0 | 0 | 2017 |
| SH7 | 0.047 | 121.53 | 31.17 | 1 | 0 | 0 | 2005 |
| SH8 | 0.058 | 121.52 | 31.17 | 1 | 0 | 0 | 2017 |
| SH10 | 0.047 | 121.52 | 31.18 | 1 | 0 | 0 | 2008 |
| SH11 | 0.050 | 121.52 | 31.18 | 0 | 0 | 0 | 2007 |
| SH12 | 0.095 | 121.52 | 31.18 | 1 | 0 | 0 | 2007 |
| SH14 | 0.070 | 121.55 | 31.19 | 0 | 0 | 0 | 2020 |
| SH15 | 0.153 | 121.50 | 31.16 | 0 | 0 | 0 | 2004 |
| SH16 | 0.096 | 121.51 | 31.16 | 1 | 0 | 1 | 2004 |
| SH17 | 0.392 | 121.52 | 31.17 | 4 | 0 | 0 | 2004 |
| SH20 | 0.074 | 121.61 | 31.21 | 2 | 0 | 0 | 2017 |
| SH21 | 0.034 | 121.55 | 31.17 | 1 | 0 | 0 | 2010 |
| SH22 | 0.016 | 121.55 | 31.17 | 0 | 0 | 0 | 2017 |
| SH24 | 0.032 | 121.42 | 31.12 | 1 | 0 | 0 | 2018 |
| SH29 | 0.058 | 121.50 | 31.27 | 1 | 0 | 0 | 2013 |
| SH30 | 0.036 | 121.50 | 31.27 | 1 | 0 | 0 | 2018 |
| SH31 | 0.017 | 121.49 | 31.26 | 1 | 0 | 0 | 2018 |
| SH33 | 0.034 | 121.49 | 31.26 | 2 | 0 | 2 | 2017 |
| SH34 | 0.023 | 121.49 | 31.26 | 1 | 0 | 0 | 2021 |
| SH35 | 0.020 | 121.49 | 31.23 | 7 | 0 | 0 | 2019 |
| SH36 | 0.012 | 121.49 | 31.23 | 1 | 0 | 0 | 2021 |
| SH37 | 0.125 | 121.50 | 31.22 | 2 | 0 | 2 | 2013 |
| SH39 | 0.020 | 121.50 | 31.22 | 3 | 0 | 0 | 2020 |
| SH40 | 0.049 | 121.55 | 31.27 | 1 | 0 | 0 | 2020 |
| SH41 | 0.027 | 121.55 | 31.27 | 2 | 0 | 0 | 2020 |
| SH42 | 0.019 | 121.55 | 31.28 | 2 | 0 | 0 | 2020 |
| SH43 | 0.071 | 121.54 | 31.27 | 1 | 0 | 1 | 2016 |
| SH44 | 0.017 | 121.54 | 31.26 | 1 | 0 | 0 | 2021 |
| SH45 | 0.029 | 121.54 | 31.27 | 2 | 0 | 0 | 2020 |
| SH46 | 0.056 | 121.54 | 31.26 | 7 | 0 | 0 | 2020 |
| SH47 | 0.014 | 121.53 | 31.26 | 2 | 0 | 0 | 2020 |
| SH49 | 0.017 | 121.54 | 31.26 | 1 | 0 | 0 | 2020 |
| SH50 | 0.088 | 121.52 | 31.27 | 3 | 0 | 1 | 2019 |
| SH51 | 0.076 | 121.52 | 31.27 | 1 | 0 | 0 | 2019 |
| GZ1 | 0.142 | 113.33 | 23.13 | 0 | 0 | 2 | 2018 |
| GZ2 | 0.057 | 113.34 | 23.12 | 3 | 1 | 2 | 2013 |
| GZ3 | 0.098 | 113.46 | 23.17 | 1 | 0 | 0 | 2010 |
| GZ4 | 0.409 | 113.37 | 23.10 | 5 | 0 | 4 | 2010 |
| GZ5 | 0.096 | 113.31 | 23.13 | 6 | 0 | 1 | 2010 |
| GZ6 | 0.066 | 113.38 | 23.12 | 0 | 0 | 3 | 2014 |
| GZ7 | 0.084 | 113.33 | 23.12 | 0 | 1 | 5 | 2008 |
| GZ8 | 0.120 | 113.33 | 23.12 | 5 | 0 | 5 | 2008 |
| GZ9 | 0.039 | 113.32 | 23.15 | 2 | 0 | 1 | 2010 |
| GZ10 | 0.012 | 113.32 | 23.15 | 0 | 0 | 1 | 2010 |
| GZ11 | 0.186 | 113.28 | 23.21 | 2 | 0 | 0 | 2020 |
